# Supplementary material for: 5-Year Survival of Patients with AIDS Receiving Antiretroviral Therapy in Haiti
Source: Atypon-hosted journal article supplement (doi:10.1056/nejmc0809485), 2009-08-19
Supplement: nejm_leger_828sa1.pdf [file nejm_leger_828sa1.pdf]

## Supplementary Appendix

This appendix has been provided by the authors to give readers additional information about their work.

Supplement to: Leger P, Charles M, Severe P, Riviere C, Pape JW, Fitzgerald DW. 5-year survival of patients with AIDS receiving antiretroviral therapy in Haiti. *N Engl J Med* 2009;361:828-9.

**Table**  
**HIV-1 resistance mutations in 91 patients with plasma HIV-1 RNA level > 1,000 copies/ml while receiving antiretroviral therapy\***

| HIV-1 mutation                                                                                  | Number of patients (%) |
|-------------------------------------------------------------------------------------------------|------------------------|
| Any drug resistance mutation                                                                    | 80 (88)                |
| Mutation conferring resistance to non-nucleoside reverse transcriptase inhibitors (NNRTI) †     | 76 (84)                |
| Reverse transcriptase M184V mutation conferring resistance to lamivudine                        | 62 (68)                |
| Mutations to both NNRTI and lamivudine                                                          | 56 (62)                |
| Mutations other than M184V conferring resistance to nucleoside reverse transcriptase inhibitors | 46 (51)                |
| Any thymidine analogue mutation (TAM)‡                                                          | 42 (46)                |
| Two or more TAMs                                                                                | 30 (33)                |
| Mutations conferring resistance to lamivudine, other NRTIs, and NNRTIs                          | 37 (41)                |

\* The HIV-1 polymerase gene was amplified by PCR and then sequenced on an automated system (Applied Biosystems). The resistance profiles to antiretroviral drugs were defined according to the Stanford University algorithms. (Liu TF, Shafer RW. Web resources for HIV type 1 genotypic-resistance test interpretation. Clin Infect Dis 2006;42:1608-18.) Mutations at positions in the polymerase gene associated with antiretroviral resistance by the International AIDS Society-USA Drug Resistance Mutations Group were noted. (Johnson VA, Brun-Vezinet F, Clotet B. Update of the drug resistance mutations in HIV-1: 2007. Top HIV Med 2007;15:119-25.)

† NNRTI mutations included K103N (43 patients), G190A (12 patients), Y181C/I (13 patients). Two patients had ≥ 3NNRTI mutations.

‡ TAMs included M41L ((20 patients), D67N (8 patients), K70R (16 patients), L210W (2 patients), T215Y/F (29 patients), K219Q/E (12 patients).
